# Supplementary material for: Why does the orientation of azulene affect the two-photon activity of a porphyrinoid–azulene system?
Source: Royal Society of Chemistry journal article supplement (doi:10.1039/d4cp00438h), 2024-01-01
Supplement: d4cp00438h1.pdf [file d4cp00438h1.pdf]

# Why orientation of azulene affects two-photon activity in a porphyrinoid-azulene system?

## ELECTRONIC SUPPLEMENTARY INFORMATION

Swati Singh Rajput,<sup>a</sup> Nikita Raghuvanshi,<sup>b</sup> Tejendra Banana,<sup>a</sup> Pooja Yadav,<sup>a</sup> and Md. Mehboob Alam,<sup>a\*</sup>

<sup>a</sup>Department of Chemistry, Indian Institute of Technology, Bhilai, Chhattisgarh, 491001, India.

<sup>b</sup>Centre for Basic Sciences, Pt. Ravishankar Shukla University, Raipur, Chhattisgarh, 492010, India  
E-mail: [mehboob@iitbhilai.ac.in](mailto:mehboob@iitbhilai.ac.in)

### Table of contents

1. Orbital diagrams.
2. Absorption wavelength and orbital contribution.
3. Natural transition orbital plots.
4. Cartesian coordinates of ground state optimized geometry of all the systems[B3LYP/6-311+G(d,p)].
5. Magnitudes of different transition dipole moment vector.
6. Two-photon absorption cross section.

## 1. Orbital diagram:-

Pr-1,2-HP:-

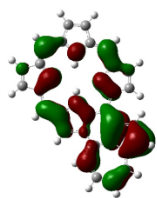

HOMO-2

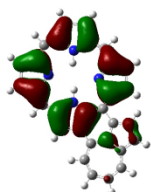

HOMO-1

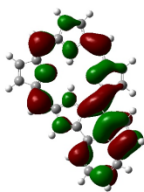

HOMO

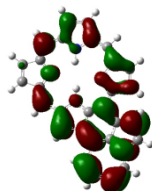

LUMO

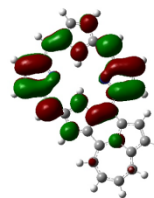

LUMO+1

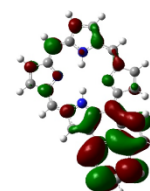

LUMO+2

Pr-1,2-PH:-

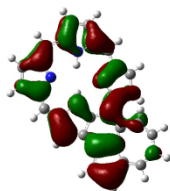

HOMO-2

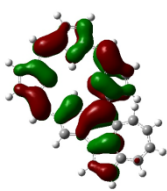

HOMO-1

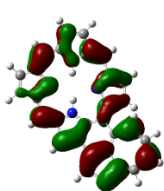

HOMO

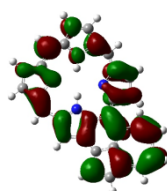

LUMO

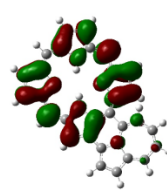

LUMO+1

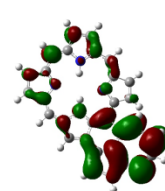

LUMO+2

NCP-1,2-HP:-

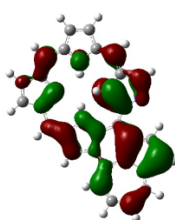

HOMO-2

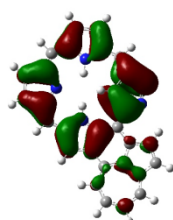

HOMO-1

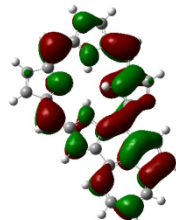

HOMO

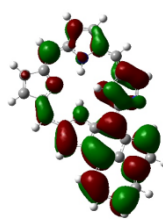

LUMO

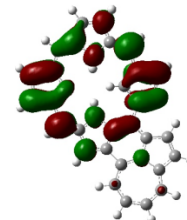

LUMO+1

NCP-1,2-PH:-

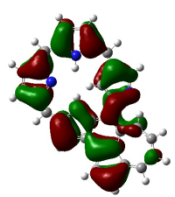

HOMO-2

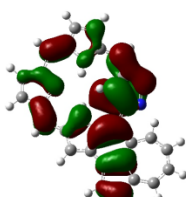

HOMO-1

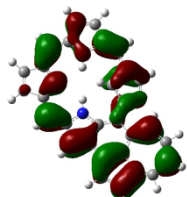

HOMO

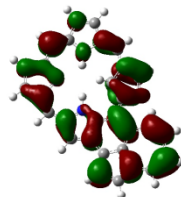

LUMO

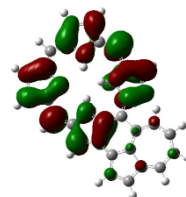

LUMO+1

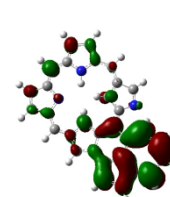

LUMO+2

SP-1,2-HP:-

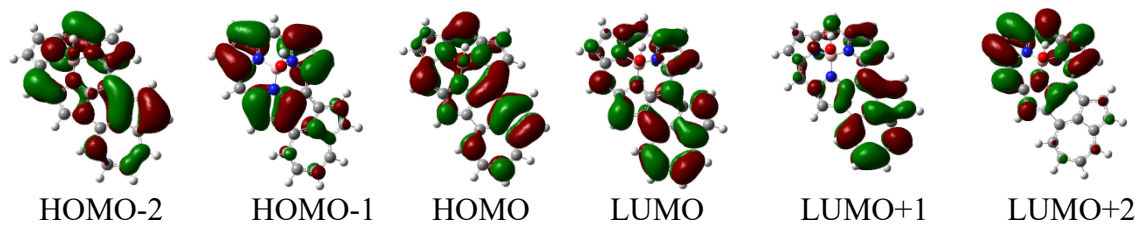

SP-1,2-PH:-

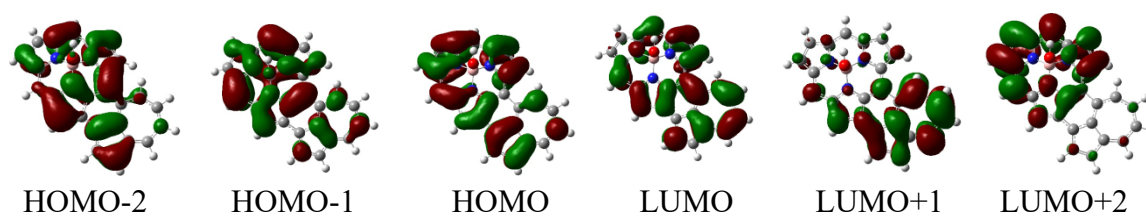

S-1,2-HP:-

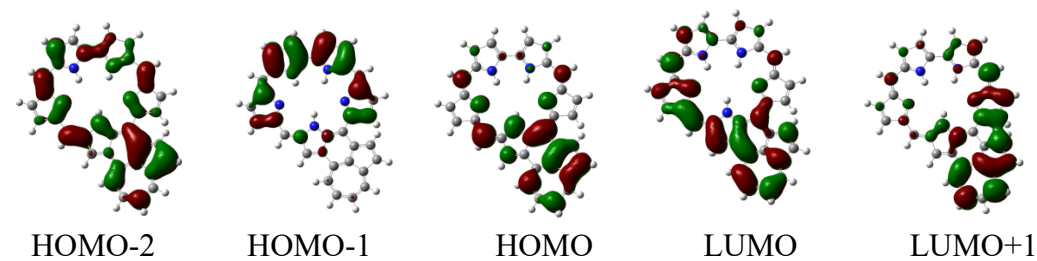

S-2,3-PH:-

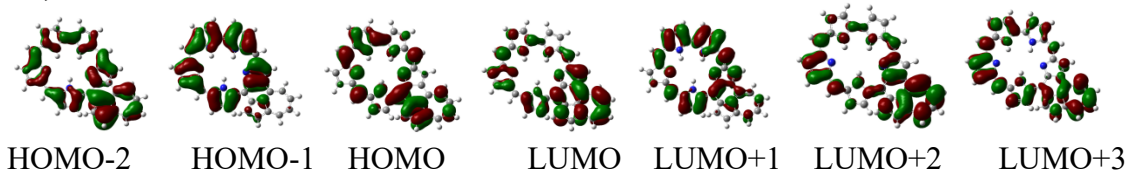

S-4,5-HP:-

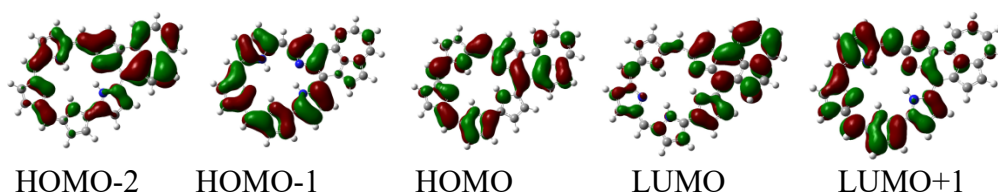

S-4,5-PH:-

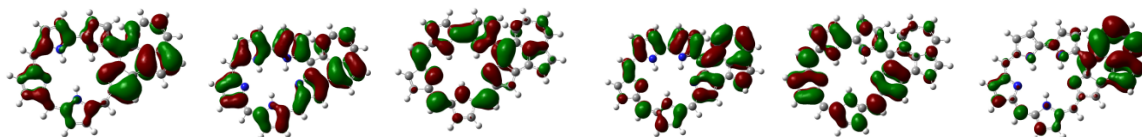

HOMO-2

HOMO-1

HOMO

LUMO

LUMO+1

LUMO+2

S-5,6-HP:-

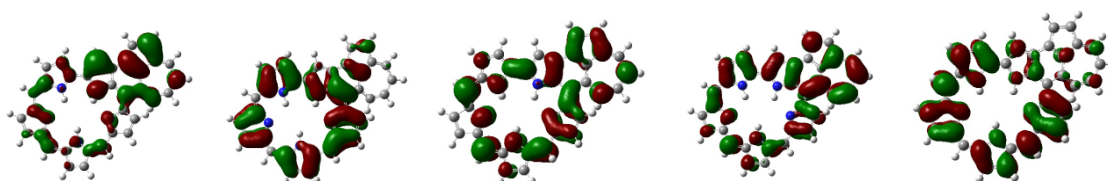

HOMO-2

HOMO-1

HOMO

LUMO

LUMO+1

S-5,6-PH:-

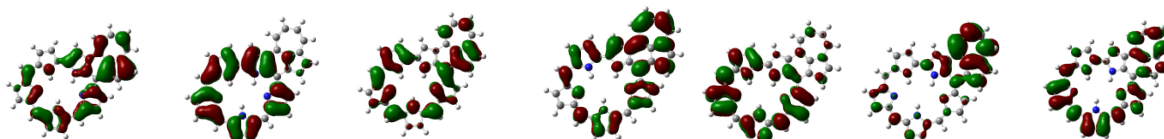

HOMO-2

HOMO-1

HOMO

LUMO

LUMO+1

LUMO+2

LUMO+3

S-7,7-HP:-

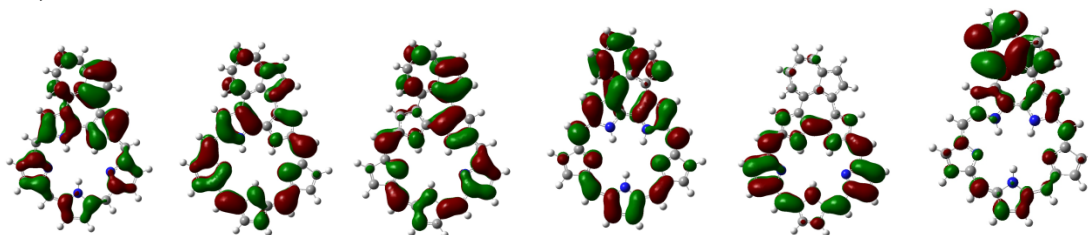

HOMO-2

HOMO-1

HOMO

LUMO

LUMO+1

LUMO+2

Hx-1,2-HP:-

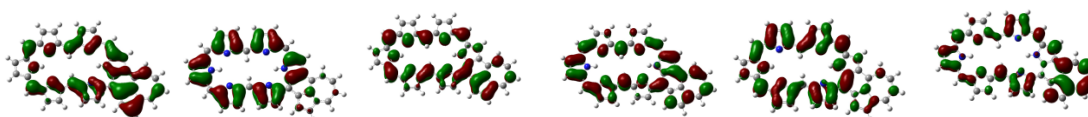

HOMO-2

HOMO-1

HOMO

LUMO

LUMO+1

LUMO+2

Hx-1,2-PH:-

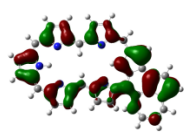

HOMO-2

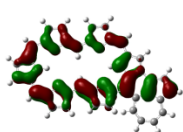

HOMO-1

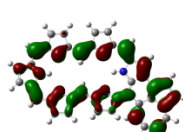

HOMO

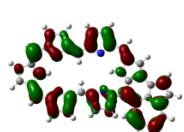

LUMO

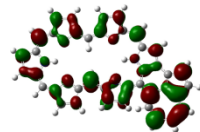

LUMO+2

Hx-2,3-HP:-

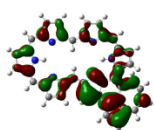

HOMO-2

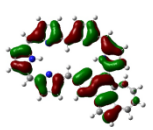

HOMO-1

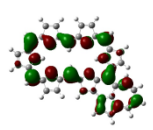

HOMO

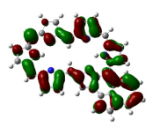

LUMO

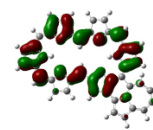

LUMO+1

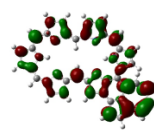

LUMO+2

Hx-2,3-PH:-

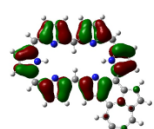

HOMO-1

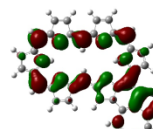

HOMO

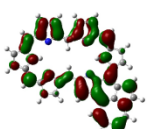

LUMO

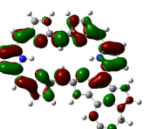

LUMO+1

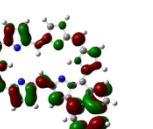

LUMO+2

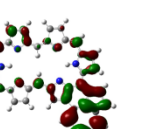

LUMO+3

Hx-4,4-HP:-

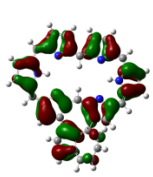

HOMO-2

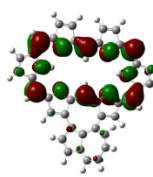

HOMO-1

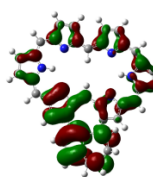

HOMO

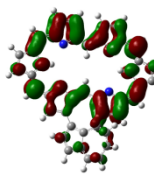

LUMO

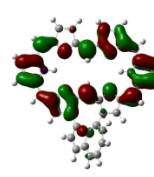

LUMO+1

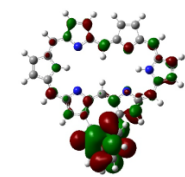

LUMO+2

## 2. Absorption wavelength and orbital contribution:-

| System     | Excited state | Absorption spectra(nm) | Transition                      | Orbital contribution                                                   | Percentage contribution          |
|------------|---------------|------------------------|---------------------------------|------------------------------------------------------------------------|----------------------------------|
| Pr-1,2-HP  | 5             | 432                    | S <sub>0</sub> ->S <sub>5</sub> | HOMO-2 -> LUMO<br>HOMO-1 -> LUMO<br>HOMO -> LUMO+1                     | 30.6%<br>13.5%<br>12.2%          |
| Pr-1,2-PH  | 5             | 422                    | S <sub>0</sub> ->S <sub>5</sub> | HOMO-1 -> LUMO<br>HOMO -> LUMO+1                                       | 33.4%<br>25.6%                   |
| NCP-1,2-HP | 5             | 447                    | S <sub>0</sub> ->S <sub>5</sub> | HOMO-2 -> LUMO<br>HOMO-1 -> LUMO                                       | 25.2%<br>24.0%                   |
| NCP-1,2-PH | 5             | 441                    | S <sub>0</sub> ->S <sub>5</sub> | HOMO-2 -> LUMO+1<br>HOMO-1 -> LUMO+1<br>HOMO -> LUMO+1                 | 31.7%<br>19.2%<br>14.7%          |
| SP-1,2-HP  | 5             | 387                    | S <sub>0</sub> ->S <sub>5</sub> | HOMO-2 -> LUMO<br>HOMO-1 -> LUMO+1                                     | 35.1%<br>26.0%                   |
| SP-1,2-PH  | 5             | 393                    | S <sub>0</sub> ->S <sub>5</sub> | HOMO -> LUMO+1                                                         | 47.1%                            |
| S-1,2-HP   | 5             | 472                    | S <sub>0</sub> ->S <sub>5</sub> | HOMO-2 -> LUMO<br>HOMO-1 -> LUMO<br>HOMO -> LUMO+1                     | 37.8%<br>15.9%<br>14.2%          |
| S-2,3-PH   | 5             | 468                    | S <sub>0</sub> ->S <sub>5</sub> | HOMO-1 -> LUMO+1<br>HOMO -> LUMO+3<br>HOMO-1 -> LUMO<br>HOMO -> LUMO+1 | 26.1%<br>18.8%<br>12.0%<br>10.7% |
| S-4,5-HP   | 5             | 474                    | S <sub>0</sub> ->S <sub>5</sub> | HOMO-1 -> LUMO+1<br>HOMO-2 -> LUMO                                     | 34.7%<br>16.2%                   |
| S-4,5-PH   | 5             | 465                    | S <sub>0</sub> ->S <sub>5</sub> | HOMO-1 -> LUMO+1<br>HOMO-2 -> LUMO+1                                   | 23.0%<br>21.1%                   |
| S-5,6-HP   | 5             | 472                    | S <sub>0</sub> ->S <sub>5</sub> | HOMO-1 -> LUMO<br>HOMO -> LUMO+1                                       | 29.9%<br>29.7%                   |
| S-5,6-PH   | 5             | 540                    | S <sub>0</sub> ->S <sub>5</sub> | HOMO -> LUMO+1<br>HOMO-2 -> LUMO                                       | 37.2%<br>18.3%                   |
| S-7,7-PH   | 5             | 454                    | S <sub>0</sub> ->S <sub>5</sub> | HOMO -> LUMO+1<br>HOMO-1 -> LUMO+2                                     | 25.0%<br>19.8%                   |
| Hx-1,2-HP  | 5             | 531                    | S <sub>0</sub> ->S <sub>5</sub> | HOMO-1 -> LUMO<br>HOMO -> LUMO+2<br>HOMO-1 -> LUMO+1<br>HOMO -> LUMO+1 | 32.6%<br>16.2%<br>14.7%<br>14.0% |
| Hx-1,2-PH  | 5             | 531                    | S <sub>0</sub> ->S <sub>5</sub> | HOMO-1 -> LUMO<br>HOMO -> LUMO+2<br>HOMO-1 -> LUMO+1<br>HOMO -> LUMO+1 | 32.6%<br>16.2%<br>14.7%<br>14.0% |
| Hx-2,3-HP  | 5             | 532                    | S <sub>0</sub> ->S <sub>5</sub> | HOMO -> LUMO+2<br>HOMO-2 -> LUMO<br>HOMO -> LUMO+1                     | 20.9%<br>14.6%<br>14.4%          |
| Hx-2,3-PH  | 5             | 520                    | S <sub>0</sub> ->S <sub>5</sub> | HOMO-1 -> LUMO+1<br>HOMO -> LUMO+3<br>HOMO-1 -> LUMO                   | 27.0%<br>15.6%<br>10.7%          |

|           |   |     |                       |                                                                                         |                         |
|-----------|---|-----|-----------------------|-----------------------------------------------------------------------------------------|-------------------------|
| Hx-4,4-HP | 5 | 568 | $S_0 \rightarrow S_5$ | HOMO-2 $\rightarrow$ LUMO+1<br>HOMO-2 $\rightarrow$ LUMO+2<br>HOMO-2 $\rightarrow$ LUMO | 30.3%<br>17.3%<br>11.7% |
|-----------|---|-----|-----------------------|-----------------------------------------------------------------------------------------|-------------------------|

**Table S1:** Different selected excited state, absorption spectra, transition, orbital contribution and percentage contribution involved for porphyrinoid-azulene systems.

**3. Natural transition orbital:-** This includes the natural transition orbital plots for all the system considered in this work, that are calculated at RICC2/cc-pVDZ level of theory and plotted utilizing Turbomole 7.3 package.

| Pr-1,2-HP<br>NTOs                                                                               |                                                                                                | Pr-1,2-PH<br>NTOs                                                                                |                                                                                                  |
|-------------------------------------------------------------------------------------------------|------------------------------------------------------------------------------------------------|--------------------------------------------------------------------------------------------------|--------------------------------------------------------------------------------------------------|
| 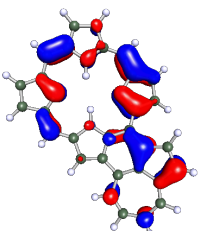<br>occupied   | <br>virtual   | <br>occupied   | <br>virtual   |
| SP-1,2-HP<br>NTOs                                                                               |                                                                                                | SP-1,2-PH<br>NTOs                                                                                |                                                                                                  |
| <br>occupied | <br>virtual | <br>occupied | <br>virtual |
| NCP-1,2-HP<br>NTOs                                                                              |                                                                                                | NCP-1,2-PH<br>NTOs                                                                               |                                                                                                  |
| <br>occupied | <br>virtual | <br>occupied | <br>virtual |
| S-1,2-HP<br>NTOs                                                                                |                                                                                                | S-2,3-PH<br>NTOs                                                                                 |                                                                                                  |

|                                                                                                 |                                                                                                |                                                                                                  |                                                                                                  |
|-------------------------------------------------------------------------------------------------|------------------------------------------------------------------------------------------------|--------------------------------------------------------------------------------------------------|--------------------------------------------------------------------------------------------------|
| 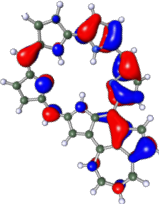<br>occupied   | <br>virtual   | <br>occupied    | <br>virtual   |
| <b>S-4,5-HP<br/>NTOs</b>                                                                        |                                                                                                | <b>S-4,5-PH<br/>NTOs</b>                                                                         |                                                                                                  |
| <br>occupied   | <br>virtual   | <br>occupied   | <br>virtual   |
| <b>S-5,6-HP<br/>NTOs</b>                                                                        |                                                                                                | <b>S-5,6-PH<br/>NTOs</b>                                                                         |                                                                                                  |
| <br>occupied  | <br>virtual  | <br>occupied  | <br>virtual  |
| <b>S-7,7-HP<br/>NTOs</b>                                                                        |                                                                                                | <b>Hx-1,2-HP<br/>NTOs</b>                                                                        |                                                                                                  |
| <br>occupied | <br>virtual | <br>occupied | <br>virtual |
| <b>Hx-1,2-PH<br/>NTOs</b>                                                                       |                                                                                                | <b>Hx-2,3-HP<br/>NTOs</b>                                                                        |                                                                                                  |



| Hx-2,3-PH<br>NTO                                                                  |                                                                                   | Hx-4,4-HP<br>NTOs                                                                  |                                                                                     |
|-----------------------------------------------------------------------------------|-----------------------------------------------------------------------------------|------------------------------------------------------------------------------------|-------------------------------------------------------------------------------------|
| 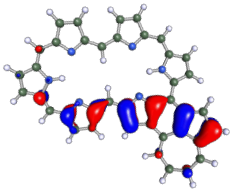 |  |  |  |
| occupied                                                                          | virtual                                                                           | occupied                                                                           | virtual                                                                             |

**4. Cartesian coordinates:-** This includes the optimized cartesian coordinates for all the system considered in this work, that are optimized at B3LYP/6-311+G(d,p) level of theory using Gaussian 16 program.

| Pr-1,2-HP |           |           |           |
|-----------|-----------|-----------|-----------|
| N         | 3.808971  | -0.919508 | 0.074267  |
| N         | 0.882822  | -1.745046 | -0.039317 |
| N         | 0.081203  | 0.978866  | -0.071275 |
| N         | 2.945019  | 1.807670  | 0.048721  |
| C         | 5.042541  | -0.328055 | 0.171255  |
| C         | 6.007341  | -1.390841 | 0.170149  |
| C         | 5.330054  | -2.575186 | 0.053375  |
| C         | 3.925590  | -2.283683 | -0.011500 |
| C         | 2.884457  | -3.190332 | -0.159126 |
| C         | 1.505434  | -2.944654 | -0.207849 |
| C         | 0.535120  | -3.997175 | -0.453022 |
| C         | -0.686321 | -3.408081 | -0.415946 |
| C         | -0.454811 | -1.998219 | -0.130576 |
| C         | -1.454345 | -0.995231 | -0.000215 |
| C         | -1.143803 | 0.382504  | -0.041157 |
| C         | -2.125349 | 1.423623  | -0.111999 |
| C         | -1.437036 | 2.629854  | -0.178639 |
| C         | -0.049429 | 2.348330  | -0.136328 |
| C         | 0.994935  | 3.283452  | -0.120887 |
| C         | 2.359489  | 3.039939  | -0.024157 |
| C         | 3.367959  | 4.094232  | 0.028578  |
| C         | 4.564811  | 3.469638  | 0.139132  |
| C         | 4.279354  | 2.037667  | 0.144839  |
| C         | 5.265371  | 1.043326  | 0.216877  |
| H         | 7.074808  | -1.246038 | 0.238967  |
| H         | 5.746493  | -3.570371 | 0.012593  |
| H         | 3.185912  | -4.227586 | -0.255999 |
| H         | 0.767932  | -5.032730 | -0.656928 |
| H         | -1.633942 | -3.874592 | -0.623621 |
| H         | -1.845274 | 3.626755  | -0.239855 |
| H         | 0.685993  | 4.321556  | -0.171843 |

|   |           |           |           |
|---|-----------|-----------|-----------|
| H | 3.167750  | 5.155545  | -0.012000 |
| H | 5.547977  | 3.913392  | 0.206472  |
| H | 6.297422  | 1.365337  | 0.289867  |
| H | 2.944815  | -0.390975 | 0.044185  |
| H | 0.954647  | 0.467445  | -0.016966 |
| C | -3.548233 | 1.117311  | -0.102148 |
| C | -4.478168 | 2.169964  | -0.217851 |
| C | -3.855982 | -0.245131 | 0.048721  |
| C | -5.867981 | 2.134169  | -0.195871 |
| H | -4.050123 | 3.158041  | -0.345441 |
| C | -5.178713 | -0.876766 | 0.246018  |
| C | -2.877216 | -1.261163 | 0.144292  |
| C | -6.744295 | 1.060983  | -0.013321 |
| H | -6.348827 | 3.099628  | -0.328143 |
| C | -6.431619 | -0.281508 | 0.203408  |
| C | -4.935104 | -2.247914 | 0.502166  |
| C | -3.568481 | -2.473213 | 0.459012  |
| H | -7.800985 | 1.308177  | -0.024693 |
| H | -7.274915 | -0.950359 | 0.357537  |
| H | -5.697191 | -2.984167 | 0.714771  |
| H | -3.101996 | -3.419983 | 0.680957  |

| <b>Pr-1,2-PH</b> |           |           |           |
|------------------|-----------|-----------|-----------|
| N                | 3.601109  | -1.226614 | 0.091786  |
| N                | 0.602775  | -1.622154 | -0.092674 |
| N                | 0.197608  | 1.196779  | -0.101658 |
| N                | 3.126593  | 1.599489  | 0.113046  |
| C                | 4.898366  | -0.820121 | 0.266229  |
| C                | 5.705232  | -1.999170 | 0.239144  |
| C                | 4.874700  | -3.072980 | 0.020413  |
| C                | 3.534981  | -2.584194 | -0.076793 |
| C                | 2.377119  | -3.322604 | -0.335670 |
| C                | 1.058488  | -2.882455 | -0.395275 |
| C                | -0.044002 | -3.740550 | -0.787266 |
| C                | -1.166754 | -2.983876 | -0.703036 |
| C                | -0.740996 | -1.666253 | -0.230226 |
| C                | -1.596683 | -0.531612 | -0.023866 |
| C                | -1.097972 | 0.777429  | -0.083522 |
| C                | -1.930796 | 1.952575  | -0.211021 |
| C                | -1.088093 | 3.045162  | -0.291281 |
| C                | 0.254626  | 2.574006  | -0.195479 |
| C                | 1.414580  | 3.339626  | -0.145376 |
| C                | 2.732799  | 2.894440  | 0.020605  |
| C                | 3.875506  | 3.796276  | 0.136888  |
| C                | 4.964968  | 3.008899  | 0.308982  |
| C                | 4.481496  | 1.633260  | 0.282278  |
| C                | 5.305113  | 0.512113  | 0.375212  |
| H                | 6.778329  | -2.010021 | 0.354864  |
| H                | 5.153209  | -4.112092 | -0.068655 |

|   |           |           |           |
|---|-----------|-----------|-----------|
| H | 2.537800  | -4.378672 | -0.523866 |
| H | 0.043626  | -4.765404 | -1.118853 |
| H | -2.166457 | -3.267694 | -0.988435 |
| H | -1.362177 | 4.083750  | -0.395004 |
| H | 1.269198  | 4.411784  | -0.214581 |
| H | 3.829393  | 4.875183  | 0.094009  |
| H | 5.995582  | 3.309376  | 0.433504  |
| H | 6.367760  | 0.681548  | 0.505009  |
| H | 2.819489  | -0.582262 | 0.054989  |
| H | 0.996028  | 0.581874  | -0.003817 |
| C | -3.343784 | 1.761220  | -0.243048 |
| C | -3.867355 | 0.482397  | -0.008272 |
| C | -4.428564 | 2.675715  | -0.405752 |
| C | -3.054297 | -0.661063 | 0.192276  |
| C | -5.339539 | 0.620455  | -0.003528 |
| H | -4.326915 | 3.738035  | -0.584050 |
| C | -5.622271 | 1.989148  | -0.285861 |
| C | -3.556963 | -1.877346 | 0.704211  |
| C | -6.297282 | -0.347355 | 0.246865  |
| H | -6.615957 | 2.407265  | -0.361858 |
| C | -4.871466 | -2.306520 | 0.888839  |
| H | -2.809317 | -2.592642 | 1.017495  |
| C | -6.087471 | -1.668754 | 0.649327  |
| H | -7.332626 | -0.026456 | 0.162769  |
| H | -4.957491 | -3.315149 | 1.284606  |
| H | -6.978173 | -2.258148 | 0.842397  |

| <b>NCP-1,2-HP</b> |           |           |           |
|-------------------|-----------|-----------|-----------|
| H                 | 7.140660  | -1.177525 | 0.180130  |
| H                 | 5.875595  | -3.542344 | 0.210326  |
| H                 | 3.276449  | -4.286489 | -0.017956 |
| H                 | 0.669137  | -4.885697 | -0.671312 |
| H                 | -1.968476 | 3.656876  | -0.012839 |
| H                 | 0.657103  | 4.381934  | -0.136917 |
| H                 | 3.116046  | 5.151579  | -0.198245 |
| H                 | 6.260340  | 1.431601  | 0.023793  |
| H                 | 3.017021  | -0.418480 | -0.033166 |
| H                 | 0.944149  | 0.651610  | -0.146445 |
| C                 | 5.082397  | -0.317513 | 0.096462  |
| C                 | 6.075710  | -1.351796 | 0.158034  |
| C                 | 5.427958  | -2.560627 | 0.169375  |

|   |           |           |           |
|---|-----------|-----------|-----------|
| C | 4.014223  | -2.322061 | 0.125677  |
| C | 2.978834  | -3.246294 | 0.069550  |
| C | 1.606464  | -2.946559 | 0.043610  |
| C | 0.539088  | -3.850969 | -0.371892 |
| C | -0.416236 | -1.935284 | -0.008382 |
| C | -1.459469 | -0.971756 | 0.005013  |
| C | -1.182651 | 0.419721  | 0.018586  |
| C | -2.184116 | 1.438809  | 0.037961  |
| C | -1.528901 | 2.671675  | -0.005269 |
| C | -0.139124 | 2.423439  | -0.055372 |
| C | 0.932172  | 3.333912  | -0.107525 |
| C | 2.292196  | 3.047038  | -0.110548 |
| C | 3.312737  | 4.089939  | -0.150903 |
| C | 4.222315  | 2.028379  | -0.048039 |
| C | 5.241035  | 1.064348  | 0.024586  |
| N | 3.868011  | -0.947386 | 0.099065  |
| N | 0.025677  | 1.059337  | -0.040085 |
| N | 2.878418  | 1.803124  | -0.054295 |
| N | -0.630550 | -3.272668 | -0.406663 |
| C | 0.942506  | -1.732149 | 0.290991  |
| H | 1.359066  | -0.882072 | 0.802421  |
| C | 4.508478  | 3.459735  | -0.112342 |
| H | 5.496725  | 3.897047  | -0.121183 |
| C | -3.599654 | 1.090242  | 0.057151  |
| C | -4.558082 | 2.119430  | 0.110146  |
| C | -3.870569 | -0.289208 | 0.010952  |
| C | -5.947794 | 2.040409  | 0.124710  |
| H | -4.159620 | 3.127367  | 0.146405  |
| C | -5.175490 | -0.983663 | 0.010732  |
| C | -2.869172 | -1.282878 | -0.024633 |
| C | -6.790595 | 0.927865  | 0.094659  |
| H | -6.456789 | 2.999371  | 0.167344  |
| C | -6.443767 | -0.424562 | 0.046071  |
| C | -4.894881 | -2.375678 | -0.027151 |
| C | -3.524361 | -2.557658 | -0.041639 |
| H | -7.854130 | 1.143887  | 0.115236  |
| H | -7.270683 | -1.130268 | 0.035842  |
| H | -5.643894 | -3.154838 | -0.039520 |
| H | -2.997117 | -3.498151 | -0.073486 |

| <b>NCP-1,2-PH</b> |           |           |           |
|-------------------|-----------|-----------|-----------|
| H                 | 6.892826  | -1.905418 | 0.326787  |
| H                 | 5.317120  | -4.074772 | 0.138355  |
| H                 | 2.658456  | -4.422677 | -0.323679 |
| H                 | 0.078829  | -4.578589 | -1.177577 |
| H                 | -1.481858 | 4.094982  | -0.161778 |
| H                 | 1.205917  | 4.431926  | -0.205418 |
| H                 | 3.731803  | 4.893098  | -0.124729 |
| H                 | 6.380930  | 0.810141  | 0.262628  |

|   |           |           |           |
|---|-----------|-----------|-----------|
| H | 2.926142  | -0.577568 | -0.009935 |
| H | 0.979042  | 0.682999  | -0.148846 |
| H | -4.410483 | 3.739553  | -0.120397 |
| H | -6.688203 | 2.373686  | -0.035600 |
| H | -2.864846 | -2.797379 | 0.376860  |
| H | -7.386478 | -0.099202 | 0.125137  |
| H | -5.009106 | -3.551751 | 0.513903  |
| H | -7.030712 | -2.420319 | 0.361763  |
| C | 4.977994  | -0.774255 | 0.212769  |
| C | 5.816544  | -1.928970 | 0.250088  |
| C | 5.008439  | -3.040293 | 0.148616  |
| C | 3.652431  | -2.604045 | 0.065056  |
| C | 2.496034  | -3.368704 | -0.119098 |
| C | 1.186401  | -2.893983 | -0.140030 |
| C | 0.050120  | -3.593916 | -0.723294 |
| C | -0.696136 | -1.639195 | -0.112938 |
| C | -1.632559 | -0.546812 | -0.006272 |
| C | -1.159402 | 0.772048  | -0.025543 |
| C | -2.005818 | 1.944876  | -0.052372 |
| C | -1.183768 | 3.058766  | -0.122825 |
| C | 0.163716  | 2.605966  | -0.134373 |
| C | 1.338896  | 3.357380  | -0.156168 |
| C | 2.661037  | 2.899158  | -0.085746 |
| C | 3.798942  | 3.816179  | -0.064789 |
| C | 4.449704  | 1.664711  | 0.090565  |
| C | 5.323079  | 0.583522  | 0.200655  |
| C | -3.412410 | 1.740137  | -0.036291 |
| C | -3.921578 | 0.436575  | 0.037100  |
| C | -4.505529 | 2.662905  | -0.071478 |
| C | -3.100364 | -0.721549 | 0.084956  |
| C | -5.393685 | 0.563906  | 0.056882  |
| C | -5.690134 | 1.959445  | -0.025709 |
| C | -3.608493 | -2.020012 | 0.292439  |
| C | -6.351364 | -0.430576 | 0.147017  |
| C | -4.924407 | -2.478147 | 0.368918  |
| C | -6.140148 | -1.804021 | 0.287332  |
| N | 3.690550  | -1.227002 | 0.129574  |
| N | 0.132727  | 1.228965  | -0.086666 |
| N | 3.082142  | 1.605697  | 0.004201  |
| N | -1.034845 | -2.870252 | -0.729935 |
| C | 0.649641  | -1.639545 | 0.251893  |
| H | 1.138481  | -0.917392 | 0.885160  |
| C | 4.907606  | 3.050054  | 0.048775  |
| H | 5.939403  | 3.367212  | 0.100339  |

|                  |           |          |           |
|------------------|-----------|----------|-----------|
| <b>SP-1,2-HP</b> |           |          |           |
| C                | -2.039773 | 3.297638 | -0.708843 |

|   |           |           |           |
|---|-----------|-----------|-----------|
| C | -0.698759 | 3.144361  | -0.422102 |
| C | -2.720864 | 2.110885  | -0.266831 |
| C | -0.522924 | 1.871747  | 0.220946  |
| N | -1.784344 | 1.341481  | 0.364984  |
| C | -3.974146 | 1.550087  | -0.609125 |
| H | -4.703927 | 2.153521  | -1.132279 |
| C | -4.165430 | 0.162341  | -0.492087 |
| C | -5.046965 | -0.778489 | -1.147393 |
| N | -3.212865 | -0.586787 | 0.136806  |
| C | -4.522260 | -2.037318 | -0.974442 |
| C | -3.302018 | -1.912076 | -0.208235 |
| C | -2.194235 | -2.755776 | -0.040349 |
| H | -2.254093 | -3.788698 | -0.356580 |
| C | -0.939380 | -2.194272 | 0.312939  |
| C | 0.419441  | -2.580580 | 0.076217  |
| N | -0.908851 | -0.874882 | 0.685369  |
| C | 1.216248  | -1.434839 | 0.218684  |
| C | 0.327838  | -0.366079 | 0.547560  |
| C | 0.597983  | 1.014769  | 0.410228  |
| B | -2.104701 | -0.012201 | 1.003136  |
| O | -2.348956 | 0.008092  | 2.416805  |
| H | -3.089898 | 0.566259  | 2.665728  |
| H | 0.730835  | -3.559688 | -0.255312 |
| H | 0.094227  | 3.817282  | -0.708235 |
| H | -2.493683 | 4.111995  | -1.253522 |
| H | -5.912466 | -0.514892 | -1.736815 |
| H | -4.896025 | -2.956091 | -1.401489 |
| C | 2.623489  | -1.123791 | -0.008985 |
| C | 3.533144  | -2.178753 | -0.213300 |
| C | 2.944110  | 0.255285  | 0.014543  |
| C | 4.906225  | -2.142218 | -0.435380 |
| H | 3.100469  | -3.173257 | -0.182114 |
| C | 4.263735  | 0.902126  | -0.158881 |
| C | 2.002250  | 1.295338  | 0.208866  |
| C | 5.783307  | -1.058154 | -0.517078 |
| H | 5.371006  | -3.116406 | -0.561250 |
| C | 5.492994  | 0.301290  | -0.391654 |
| C | 4.054444  | 2.301256  | -0.047977 |
| C | 2.705361  | 2.533457  | 0.173229  |
| H | 6.823824  | -1.307236 | -0.699320 |
| H | 6.336369  | 0.980530  | -0.489992 |
| H | 4.831385  | 3.049234  | -0.117457 |
| H | 2.256664  | 3.505638  | 0.325093  |

**SP-1,2-PH**

|   |           |           |           |
|---|-----------|-----------|-----------|
| C | -1.414980 | 3.330834  | -0.766437 |
| C | -0.116031 | 2.934053  | -0.518250 |
| C | -2.287237 | 2.303760  | -0.276826 |
| C | -0.156831 | 1.661954  | 0.154190  |
| N | -1.483528 | 1.376480  | 0.339696  |
| C | -3.629144 | 1.983852  | -0.570160 |
| H | -4.247680 | 2.709552  | -1.082147 |
| C | -4.085294 | 0.661066  | -0.419242 |
| C | -5.138435 | -0.097751 | -1.043119 |
| N | -3.263803 | -0.251358 | 0.184412  |
| C | -4.843731 | -1.435196 | -0.880827 |
| C | -3.604137 | -1.530876 | -0.151423 |
| C | -2.653965 | -2.570231 | -0.019010 |
| H | -2.914733 | -3.571055 | -0.336802 |
| C | -1.316372 | -2.252862 | 0.277749  |
| C | -0.050145 | -2.893024 | 0.009064  |
| N | -1.030736 | -0.958810 | 0.640436  |
| C | 0.940548  | -1.920868 | 0.114556  |
| C | 0.274172  | -0.693446 | 0.466877  |
| C | 0.798274  | 0.606520  | 0.349795  |
| B | -2.031061 | 0.107415  | 1.000776  |
| O | -2.212676 | 0.175459  | 2.421840  |
| H | -2.850056 | 0.841186  | 2.692226  |
| H | 0.067937  | -3.915037 | -0.317400 |
| H | 0.773525  | 3.439628  | -0.857498 |
| H | -1.725970 | 4.205516  | -1.317952 |
| H | -5.958346 | 0.318891  | -1.608852 |
| H | -5.389508 | -2.270588 | -1.293371 |
| C | 2.345180  | -1.792058 | -0.145440 |
| C | 2.953191  | -0.520917 | -0.072302 |
| C | 3.347877  | -2.754167 | -0.462738 |
| C | 2.259280  | 0.691434  | 0.193077  |
| C | 4.393606  | -0.728478 | -0.346436 |
| H | 3.174309  | -3.816591 | -0.572040 |
| C | 4.571016  | -2.119668 | -0.589189 |
| C | 2.875817  | 1.944415  | 0.372784  |
| C | 5.415214  | 0.206819  | -0.371547 |
| H | 5.517688  | -2.586773 | -0.820796 |
| C | 4.211839  | 2.321563  | 0.238935  |
| H | 2.213728  | 2.741047  | 0.688580  |
| C | 5.337624  | 1.576684  | -0.106803 |
| H | 6.402937  | -0.180023 | -0.610164 |
| H | 4.403443  | 3.372184  | 0.440474  |
| H | 6.271880  | 2.126654  | -0.158326 |

**S-1,2-HP**

|   |          |          |          |
|---|----------|----------|----------|
| C | 5.182967 | 1.487895 | 0.703541 |
| C | 6.406756 | 0.876315 | 1.087389 |

|   |           |           |           |
|---|-----------|-----------|-----------|
| C | 4.896923  | -0.747192 | 0.623493  |
| N | 4.286190  | 0.469872  | 0.463826  |
| H | 3.353485  | 0.698747  | 0.122042  |
| H | 7.305046  | 1.411069  | 1.355212  |
| C | 4.308893  | -1.995532 | 0.342806  |
| C | 4.970847  | -3.243922 | 0.213432  |
| C | 4.046480  | -4.173196 | -0.216838 |
| C | 2.792101  | -3.521925 | -0.340088 |
| N | 2.992469  | -2.203041 | 0.010446  |
| H | 4.220009  | -5.215769 | -0.435178 |
| C | 0.317993  | -3.453208 | -0.749449 |
| C | -0.876427 | -4.176565 | -1.128034 |
| C | -1.916671 | -3.336583 | -0.904433 |
| H | -0.901519 | -5.182742 | -1.521641 |
| H | -2.958964 | -3.507474 | -1.117188 |
| C | 1.567667  | -4.063286 | -0.726933 |
| C | -1.341978 | -2.095090 | -0.401362 |
| N | 0.009097  | -2.168047 | -0.350305 |
| C | -0.707812 | 2.327145  | -0.648499 |
| C | -1.794815 | 0.383091  | -0.211713 |
| H | -2.506658 | 3.591904  | -0.708975 |
| C | 1.598479  | 3.515881  | -0.602012 |
| C | 2.178431  | 4.855715  | -0.684218 |
| C | 3.464491  | 4.744417  | -0.280490 |
| C | 3.671716  | 3.337372  | 0.022118  |
| N | 2.530153  | 2.610185  | -0.197383 |
| H | 1.645748  | 5.745683  | -0.988114 |
| H | 4.210846  | 5.520539  | -0.188729 |
| C | -2.162198 | -0.965232 | -0.079746 |
| C | -2.096571 | 2.602981  | -0.576644 |
| C | 0.225658  | 3.357974  | -0.808779 |
| N | -0.565406 | 0.964261  | -0.441912 |
| C | 4.887315  | 2.832336  | 0.483244  |
| H | 1.594550  | -5.108102 | -1.015775 |
| H | 5.689598  | 3.540551  | 0.652947  |
| H | -0.269151 | 4.293180  | -1.050422 |
| H | 2.208147  | -1.563948 | 0.080116  |
| H | 0.300639  | 0.446965  | -0.457668 |
| C | 6.232553  | -0.491309 | 1.033062  |
| H | 6.023569  | -3.403387 | 0.383985  |
| H | 6.965085  | -1.249986 | 1.258603  |
| C | -2.771506 | 1.438394  | -0.264518 |
| C | -3.554018 | -1.159257 | 0.300250  |
| C | -4.512624 | -0.124745 | 0.284446  |
| C | -4.202943 | -2.321163 | 0.816855  |
| C | -5.800481 | -0.696612 | 0.741016  |
| C | -4.188711 | 1.200020  | -0.025643 |
| C | -5.543843 | -2.048763 | 1.062595  |
| H | -3.715416 | -3.262247 | 1.023975  |
| C | -7.027662 | -0.054820 | 0.844979  |



|   |           |           |           |
|---|-----------|-----------|-----------|
| C | -5.095948 | 2.280569  | -0.088310 |
| H | -6.274464 | -2.743422 | 1.452416  |
| C | -7.330215 | 1.276959  | 0.563474  |
| H | -7.855211 | -0.672608 | 1.185580  |
| C | -6.463410 | 2.297203  | 0.152554  |
| H | -4.668674 | 3.239073  | -0.360373 |
| H | -8.367389 | 1.567713  | 0.695901  |
| H | -6.935412 | 3.266453  | 0.015295  |

| S-2,3-PH |           |           |           |
|----------|-----------|-----------|-----------|
| C        | -5.499541 | 0.279536  | 0.790872  |
| C        | -6.333361 | 1.400334  | 1.044393  |
| C        | -4.307635 | 2.142702  | 0.355035  |
| N        | -4.274918 | 0.771911  | 0.399415  |
| H        | -3.552432 | 0.118910  | 0.095291  |
| H        | -7.356642 | 1.343637  | 1.382412  |
| C        | -3.232071 | 2.972649  | -0.013805 |
| C        | -3.265000 | 4.375819  | -0.234780 |
| C        | -1.994510 | 4.782815  | -0.577801 |
| C        | -1.145907 | 3.642748  | -0.560806 |
| N        | -1.942803 | 2.561144  | -0.238076 |
| H        | -1.668997 | 5.785122  | -0.810773 |
| C        | 1.084267  | 2.493567  | -0.560907 |
| C        | 2.507827  | 2.654870  | -0.524784 |
| C        | 3.035123  | 1.421178  | -0.238356 |
| H        | 3.024882  | 3.591629  | -0.672564 |
| C        | 0.232956  | 3.591797  | -0.715358 |
| C        | 1.884060  | 0.514323  | -0.167966 |
| N        | 0.722267  | 1.178109  | -0.350596 |
| C        | -0.684091 | -3.111176 | -0.805448 |
| C        | 1.208854  | -1.915633 | -0.400115 |
| H        | 0.369457  | -4.898931 | -1.588947 |
| C        | -3.236693 | -3.194154 | -0.374038 |
| C        | -4.332980 | -4.155831 | -0.275539 |
| C        | -5.389770 | -3.484370 | 0.237384  |
| C        | -4.950746 | -2.108354 | 0.403734  |
| N        | -3.635034 | -1.962318 | 0.035053  |
| H        | -4.270104 | -5.200041 | -0.547163 |
| H        | -6.378192 | -3.857440 | 0.464710  |
| C        | 2.118099  | -0.888130 | -0.054673 |
| C        | 0.443823  | -3.905296 | -1.174043 |
| C        | -1.976787 | -3.633023 | -0.799967 |
| N        | -0.175600 | -1.892377 | -0.390257 |
| C        | -5.803660 | -1.083603 | 0.804258  |
| H        | 0.713158  | 4.543131  | -0.915185 |
| H        | -6.813925 | -1.354275 | 1.087220  |

|   |           |           |           |
|---|-----------|-----------|-----------|
| H | -1.983447 | -4.664701 | -1.136707 |
| H | -1.534450 | 1.642093  | -0.107338 |
| H | -0.724426 | -1.112724 | -0.062272 |
| C | -5.605812 | 2.540854  | 0.767570  |
| H | -4.147504 | 4.990428  | -0.156312 |
| H | -5.938817 | 3.562514  | 0.859482  |
| C | 1.582368  | -3.195283 | -0.912110 |
| H | 2.595627  | -3.494702 | -1.116920 |
| C | 3.477360  | -1.258187 | 0.310235  |
| C | 4.563751  | -0.359125 | 0.281523  |
| C | 3.974947  | -2.495854 | 0.822467  |
| C | 5.766332  | -1.090817 | 0.723912  |
| C | 4.408528  | 0.999809  | -0.027493 |
| C | 5.340642  | -2.400730 | 1.053414  |
| H | 3.371708  | -3.365119 | 1.040177  |
| C | 7.070171  | -0.618247 | 0.814087  |
| C | 5.451380  | 1.947694  | -0.106147 |
| H | 5.979548  | -3.182461 | 1.439435  |
| C | 7.542101  | 0.660696  | 0.524941  |
| H | 7.811923  | -1.340015 | 1.147593  |
| C | 6.812410  | 1.784564  | 0.118721  |
| H | 5.150162  | 2.953228  | -0.377627 |
| H | 8.610048  | 0.812879  | 0.644876  |
| H | 7.406425  | 2.682714  | -0.028621 |

| <b>S-4,5-HP</b> |           |           |           |
|-----------------|-----------|-----------|-----------|
| C               | -4.289764 | -2.781126 | -0.070518 |
| C               | -4.083338 | -4.172640 | -0.230068 |
| C               | -2.724934 | -4.390839 | -0.340010 |
| C               | -2.067495 | -3.138094 | -0.244366 |
| N               | -3.044621 | -2.186052 | -0.087856 |
| H               | -2.961564 | -1.177750 | -0.003060 |
| H               | -4.869528 | -4.911420 | -0.254763 |
| H               | -2.229680 | -5.340253 | -0.462766 |
| C               | -0.666738 | -2.942113 | -0.262805 |
| C               | 0.299261  | -3.962134 | -0.442758 |
| C               | 1.550001  | -3.389747 | -0.346761 |
| C               | 1.384662  | -2.003812 | -0.100726 |
| N               | 0.020848  | -1.771591 | -0.073491 |
| H               | 0.078676  | -4.999004 | -0.637475 |
| H               | 2.488386  | -3.893904 | -0.492822 |
| C               | 1.993367  | 0.401239  | -0.053782 |
| C               | 3.027432  | 1.417433  | -0.154522 |
| C               | 2.352084  | 2.606357  | -0.290524 |
| H               | 2.756388  | 3.602114  | -0.399322 |
| C               | 2.344638  | -0.971073 | 0.036005  |
| C               | 0.950078  | 2.296472  | -0.242217 |

|   |           |           |           |
|---|-----------|-----------|-----------|
| N | 0.747741  | 0.949335  | -0.112260 |
| C | -3.587825 | 3.236687  | 0.089767  |
| C | -1.346507 | 3.510850  | -0.180596 |
| C | -1.971069 | 4.804257  | -0.178329 |
| H | -4.070875 | 5.406439  | 0.049189  |
| H | -1.426211 | 5.729768  | -0.287431 |
| C | -5.376881 | 1.415595  | 0.287664  |
| C | -6.815410 | 1.200661  | 0.425419  |
| C | -7.008379 | -0.136917 | 0.373637  |
| C | -5.689752 | -0.729204 | 0.209487  |
| N | -4.713617 | 0.239378  | 0.169859  |
| H | -7.553455 | 1.982333  | 0.536253  |
| H | -7.936790 | -0.686712 | 0.434165  |
| C | 0.023645  | 3.359424  | -0.288240 |
| C | -3.311525 | 4.641384  | -0.005283 |
| C | -4.865158 | 2.721930  | 0.249926  |
| N | -2.371828 | 2.590085  | -0.022079 |
| C | -5.498629 | -2.097907 | 0.087193  |
| H | -6.386516 | -2.719444 | 0.110490  |
| H | -5.620839 | 3.495368  | 0.335442  |
| H | 0.513660  | 4.321162  | -0.402652 |
| H | -0.322873 | -0.814390 | 0.005548  |
| H | -2.261474 | 1.588867  | 0.013627  |
| C | 4.444465  | 1.109682  | -0.102714 |
| C | 5.386465  | 2.149388  | -0.240288 |
| C | 4.748275  | -0.246600 | 0.112209  |
| C | 6.774629  | 2.104085  | -0.182761 |
| H | 4.968954  | 3.134276  | -0.417782 |
| C | 6.054341  | -0.880338 | 0.359218  |
| C | 3.756368  | -1.245709 | 0.222582  |
| C | 7.639581  | 1.033029  | 0.063465  |
| H | 7.266508  | 3.060049  | -0.341314 |
| C | 7.314777  | -0.297712 | 0.322823  |
| C | 5.792811  | -2.243066 | 0.656574  |
| C | 4.426567  | -2.456799 | 0.589063  |
| H | 8.697750  | 1.274599  | 0.067568  |
| H | 8.149491  | -0.966008 | 0.519651  |
| H | 6.543551  | -2.977787 | 0.910795  |
| H | 3.946503  | -3.392238 | 0.830878  |

| S-4,5-PH |           |           |           |
|----------|-----------|-----------|-----------|
| C        | -3.937516 | -3.013868 | -0.227217 |
| C        | -3.588283 | -4.358775 | -0.520713 |
| C        | -2.221679 | -4.421571 | -0.667570 |
| C        | -1.692942 | -3.116060 | -0.459928 |
| N        | -2.758791 | -2.291284 | -0.210548 |
| H        | -2.777909 | -1.292896 | -0.026735 |
| H        | -4.294037 | -5.171081 | -0.603347 |
| H        | -1.632169 | -5.297448 | -0.884437 |

|   |           |           |           |
|---|-----------|-----------|-----------|
| C | -0.324537 | -2.776302 | -0.453234 |
| C | 0.747320  | -3.668064 | -0.689523 |
| C | 1.928742  | -2.977125 | -0.512801 |
| C | 1.609323  | -1.639762 | -0.156610 |
| N | 0.234145  | -1.555290 | -0.146125 |
| H | 0.644215  | -4.703521 | -0.971145 |
| H | 2.920855  | -3.361368 | -0.674014 |
| C | 1.949313  | 0.807437  | -0.127808 |
| C | 2.874258  | 1.923825  | -0.346884 |
| C | 2.082474  | 3.017195  | -0.553021 |
| H | 2.384449  | 4.035015  | -0.751886 |
| C | 2.448913  | -0.505250 | 0.036392  |
| C | 0.715420  | 2.567365  | -0.413450 |
| N | 0.651973  | 1.215070  | -0.182513 |
| C | -3.844490 | 3.004671  | 0.264802  |
| C | -1.687028 | 3.519533  | -0.222350 |
| C | -2.443431 | 4.735872  | -0.158036 |
| H | -4.563592 | 5.105798  | 0.289565  |
| H | -2.016966 | 5.714265  | -0.318468 |
| C | -5.417229 | 0.999612  | 0.525058  |
| C | -6.810798 | 0.628100  | 0.732978  |
| C | -6.874613 | -0.716415 | 0.577175  |
| C | -5.520037 | -1.152302 | 0.288597  |
| N | -4.649395 | -0.093455 | 0.275711  |
| H | -7.614157 | 1.317576  | 0.950176  |
| H | -7.739207 | -1.361336 | 0.643051  |
| C | -0.314858 | 3.516087  | -0.449313 |
| C | -3.734703 | 4.427642  | 0.155153  |
| C | -5.040139 | 2.350243  | 0.520703  |
| N | -2.578377 | 2.495534  | 0.031198  |
| C | -5.196779 | -2.483939 | 0.030118  |
| H | -6.015845 | -3.194145 | 0.027440  |
| H | -5.860010 | 3.036920  | 0.703843  |
| H | 0.053010  | 4.519495  | -0.637906 |
| H | -0.207440 | -0.639651 | -0.051123 |
| H | -2.350324 | 1.513834  | 0.049442  |
| C | 4.279013  | 1.683771  | -0.318759 |
| C | 4.753702  | 0.421995  | 0.049232  |
| C | 5.400097  | 2.547107  | -0.527977 |
| C | 6.227941  | 0.512092  | 0.094261  |
| C | 3.890548  | -0.670429 | 0.316345  |
| C | 6.565996  | 1.840837  | -0.302429 |
| H | 5.338205  | 3.590626  | -0.807264 |
| C | 7.141800  | -0.456305 | 0.468565  |
| C | 4.330783  | -1.858790 | 0.933997  |
| H | 7.575192  | 2.219795  | -0.380356 |
| C | 6.868091  | -1.730556 | 0.976762  |
| H | 8.190397  | -0.177833 | 0.399527  |
| C | 5.623662  | -2.309168 | 1.212823  |
| H | 3.549356  | -2.528104 | 1.266328  |

|   |          |           |          |
|---|----------|-----------|----------|
| H | 7.729226 | -2.328171 | 1.258933 |
| H | 5.659847 | -3.284015 | 1.692298 |

| <b>S-5,6-HP</b> |           |           |           |
|-----------------|-----------|-----------|-----------|
| C               | 3.109061  | -3.409489 | 0.256348  |
| C               | 2.437480  | -4.638077 | 0.503957  |
| C               | 1.088492  | -4.376100 | 0.586198  |
| C               | 0.896838  | -2.979586 | 0.398521  |
| N               | 2.142461  | -2.426607 | 0.225721  |
| H               | 2.405635  | -1.468144 | 0.013918  |
| H               | 2.925582  | -5.596047 | 0.597129  |
| H               | 0.297743  | -5.086918 | 0.764840  |
| C               | -0.335953 | -2.302733 | 0.346709  |
| C               | -1.620285 | -2.895024 | 0.323440  |
| C               | -2.556439 | -1.881280 | 0.157986  |
| C               | -1.835039 | -0.646017 | 0.104642  |
| N               | -0.502541 | -0.937135 | 0.226088  |
| H               | -1.812197 | -3.953451 | 0.394023  |
| C               | -1.689969 | 1.798344  | 0.371318  |
| C               | -2.258406 | 3.015706  | 0.930025  |
| C               | -1.214318 | 3.853689  | 1.150026  |
| H               | -1.236747 | 4.848498  | 1.571745  |
| C               | -2.435097 | 0.617951  | 0.051242  |
| C               | -0.019820 | 3.148909  | 0.725401  |
| N               | -0.334605 | 1.884218  | 0.296352  |
| C               | 4.416412  | 2.472350  | -0.357159 |
| C               | 2.509816  | 3.498400  | 0.323522  |
| C               | 3.535706  | 4.484553  | 0.202117  |
| H               | 5.636464  | 4.324287  | -0.436105 |
| H               | 3.388346  | 5.532832  | 0.412944  |
| C               | 5.448235  | 0.139831  | -0.631726 |
| C               | 6.714361  | -0.550725 | -0.859538 |
| C               | 6.480507  | -1.863788 | -0.632474 |
| C               | 5.070239  | -1.969953 | -0.291503 |
| N               | 4.462463  | -0.742590 | -0.308124 |
| H               | 7.643528  | -0.071811 | -1.133889 |
| H               | 7.174480  | -2.690415 | -0.686278 |
| C               | 1.206401  | 3.814760  | 0.706703  |
| C               | 4.677477  | 3.871411  | -0.236002 |
| C               | 5.399244  | 1.536063  | -0.672367 |
| N               | 3.087167  | 2.291796  | -0.027604 |
| C               | 4.460919  | -3.188884 | 0.006272  |
| H               | 5.096047  | -4.066953 | 0.016274  |
| H               | 6.346058  | 2.001342  | -0.925774 |

|   |           |           |           |
|---|-----------|-----------|-----------|
| H | 1.125863  | 4.853501  | 1.011756  |
| H | 0.177395  | -0.181645 | 0.256788  |
| H | 2.620101  | 1.398736  | -0.024315 |
| H | -3.294596 | 3.179706  | 1.176925  |
| C | -3.878875 | 0.635552  | -0.255414 |
| C | -4.452938 | 1.834875  | -0.738951 |
| C | -4.596286 | -0.582207 | -0.165095 |
| C | -5.783227 | 2.157422  | -0.997759 |
| H | -3.751390 | 2.628659  | -0.955764 |
| C | -6.046056 | -0.848218 | -0.290178 |
| C | -3.978598 | -1.820750 | 0.069251  |
| C | -6.950655 | 1.400356  | -0.888126 |
| H | -5.933988 | 3.176445  | -1.344603 |
| C | -7.066633 | 0.045662  | -0.570662 |
| C | -6.224031 | -2.246308 | -0.082319 |
| C | -4.985727 | -2.831256 | 0.112701  |
| H | -7.875298 | 1.919380  | -1.119607 |
| H | -8.071869 | -0.368493 | -0.582110 |
| H | -7.178620 | -2.752783 | -0.101490 |
| H | -4.804162 | -3.887126 | 0.263925  |

| <b>S-5,6-PH</b> |           |           |           |
|-----------------|-----------|-----------|-----------|
| C               | 2.686052  | -3.583449 | -0.262901 |
| C               | 1.859202  | -4.711847 | -0.472327 |
| C               | 0.547500  | -4.276018 | -0.514757 |
| C               | 0.546573  | -2.871892 | -0.335402 |
| N               | 1.853718  | -2.482981 | -0.201884 |
| H               | 2.244585  | -1.562682 | -0.020971 |
| H               | 2.215326  | -5.725516 | -0.573374 |
| H               | -0.332077 | -4.881261 | -0.663886 |
| C               | -0.596153 | -2.032553 | -0.268913 |
| C               | -1.932444 | -2.462574 | -0.221890 |
| C               | -2.746699 | -1.333500 | -0.089795 |
| C               | -1.888096 | -0.203263 | -0.073501 |
| N               | -0.601594 | -0.656236 | -0.184574 |
| H               | -2.241036 | -3.494358 | -0.258959 |
| C               | -1.447483 | 2.221379  | -0.265969 |
| C               | -1.849359 | 3.564396  | -0.636412 |
| C               | -0.704648 | 4.278665  | -0.769843 |
| H               | -0.596381 | 5.316035  | -1.053117 |
| C               | -2.331698 | 1.137456  | -0.042067 |
| C               | 0.390256  | 3.369112  | -0.477545 |
| N               | -0.078531 | 2.121085  | -0.209590 |
| C               | 4.774046  | 2.082855  | 0.318922  |
| C               | 2.964335  | 3.372931  | -0.163193 |
| C               | 4.114452  | 4.223227  | -0.042312 |
| H               | 6.211473  | 3.774909  | 0.433439  |

|   |           |           |           |
|---|-----------|-----------|-----------|
| H | 4.080711  | 5.294482  | -0.170502 |
| C | 5.517761  | -0.368634 | 0.460653  |
| C | 6.698162  | -1.215801 | 0.600755  |
| C | 6.281667  | -2.488214 | 0.401630  |
| C | 4.850951  | -2.411345 | 0.160194  |
| N | 4.410403  | -1.107520 | 0.209392  |
| H | 7.697937  | -0.861282 | 0.807475  |
| H | 6.865367  | -3.397593 | 0.414760  |
| C | 1.701511  | 3.875011  | -0.438632 |
| C | 5.194348  | 3.453665  | 0.268484  |
| C | 5.649765  | 1.029560  | 0.527016  |
| N | 3.413738  | 2.083339  | 0.066371  |
| C | 4.071167  | -3.533606 | -0.083336 |
| H | 4.584076  | -4.488069 | -0.118555 |
| H | 6.663070  | 1.364377  | 0.721999  |
| H | 1.736950  | 4.943540  | -0.626048 |
| H | 0.162138  | 0.016835  | -0.216231 |
| H | 2.845040  | 1.252176  | 0.034687  |
| H | -2.853299 | 3.900476  | -0.832556 |
| C | -3.760810 | 1.261750  | 0.175152  |
| C | -4.630359 | 0.145722  | 0.160763  |
| C | -4.556652 | 2.405930  | 0.501152  |
| C | -5.997592 | 0.641964  | 0.423144  |
| C | -4.188603 | -1.180124 | 0.012246  |
| C | -5.885815 | 2.039624  | 0.631076  |
| H | -4.177903 | 3.402001  | 0.669885  |
| C | -7.180668 | -0.082137 | 0.472604  |
| C | -5.008494 | -2.327653 | -0.024625 |
| H | -6.708864 | 2.697510  | 0.871827  |
| C | -7.362169 | -1.455387 | 0.305694  |
| H | -8.079351 | 0.499169  | 0.664445  |
| C | -6.389424 | -2.435980 | 0.088004  |
| H | -4.487191 | -3.268637 | -0.161379 |
| H | -8.385228 | -1.812041 | 0.367825  |
| H | -6.772976 | -3.449500 | 0.006834  |

| <b>S-7,7-HP</b> |           |           |           |
|-----------------|-----------|-----------|-----------|
| C               | 0.397758  | -2.945680 | -0.185645 |
| C               | 1.790513  | -3.090511 | -0.334845 |
| C               | 2.386820  | -1.831610 | -0.258370 |
| C               | 1.327413  | -0.898014 | -0.053206 |
| N               | 0.144360  | -1.600307 | -0.033560 |
| H               | -0.800097 | -1.271991 | 0.138065  |
| H               | 2.287542  | -4.037256 | -0.473351 |
| C               | 1.447613  | 0.493223  | 0.016566  |
| C               | 2.640281  | 1.284799  | 0.130407  |
| C               | 2.222563  | 2.616622  | 0.046858  |

|   |           |           |           |
|---|-----------|-----------|-----------|
| C | 0.824185  | 2.662968  | -0.073430 |
| N | 0.383355  | 1.359197  | -0.059654 |
| C | -1.373480 | 3.841777  | -0.289936 |
| C | -2.095207 | 5.096568  | -0.434251 |
| C | -3.408267 | 4.774325  | -0.437159 |
| H | -4.261334 | 5.432683  | -0.519610 |
| C | 0.010999  | 3.791684  | -0.210327 |
| C | -3.477912 | 3.322363  | -0.288970 |
| N | -2.239724 | 2.775729  | -0.215777 |
| C | -5.331180 | -0.845232 | 0.293660  |
| C | -5.169614 | 1.400968  | -0.002841 |
| C | -6.555437 | 1.060607  | 0.151845  |
| H | -7.545336 | -0.870385 | 0.491516  |
| H | -7.355768 | 1.784268  | 0.123490  |
| C | -3.937987 | -3.005676 | 0.293005  |
| C | -4.072655 | -4.460356 | 0.311499  |
| C | -2.829661 | -4.960904 | 0.130937  |
| C | -1.943569 | -3.811406 | 0.025925  |
| N | -2.644870 | -2.633384 | 0.130331  |
| H | -5.002402 | -4.997742 | 0.432800  |
| H | -2.520304 | -5.994905 | 0.077568  |
| C | -4.735818 | 2.702862  | -0.194807 |
| C | -6.651388 | -0.284590 | 0.340847  |
| C | -5.088374 | -2.205822 | 0.393511  |
| N | -4.465134 | 0.214539  | 0.094446  |
| C | -0.572835 | -3.950664 | -0.144462 |
| H | -0.196165 | -4.962822 | -0.238454 |
| H | -6.000110 | -2.775656 | 0.538867  |
| H | -5.563213 | 3.402223  | -0.254486 |
| H | -0.603594 | 1.149308  | -0.166443 |
| H | -3.464354 | 0.128537  | 0.005017  |
| H | -1.640297 | 6.073433  | -0.514981 |
| H | 0.535880  | 4.739149  | -0.253454 |
| H | 2.847879  | 3.493958  | 0.039751  |
| C | 4.050991  | 0.887183  | 0.320538  |
| C | 4.857166  | 1.917907  | 0.881030  |
| C | 4.535421  | -0.383629 | -0.046983 |
| C | 6.228560  | 2.070899  | 1.014224  |
| H | 4.294430  | 2.749728  | 1.282129  |
| C | 5.982012  | -0.750093 | -0.210147 |
| C | 3.798578  | -1.553464 | -0.392100 |
| C | 7.273709  | 1.237350  | 0.614444  |
| H | 6.530839  | 2.999550  | 1.491360  |
| C | 7.140077  | -0.021672 | 0.048950  |
| C | 6.019369  | -2.069603 | -0.698195 |
| C | 4.724022  | -2.552060 | -0.784636 |
| H | 8.282131  | 1.600910  | 0.779872  |
| H | 8.064358  | -0.540894 | -0.193612 |
| H | 6.924078  | -2.610005 | -0.938755 |
| H | 4.451932  | -3.549233 | -1.101404 |



**S-7,7-PH**

|   |           |           |           |
|---|-----------|-----------|-----------|
| C | -0.823905 | 2.662823  | -0.073646 |
| C | -2.222292 | 2.616551  | 0.046749  |
| C | -2.640122 | 1.284786  | 0.130259  |
| C | -1.447467 | 0.493097  | 0.016107  |
| N | -0.383190 | 1.359050  | -0.060265 |
| H | 0.603674  | 1.149044  | -0.167481 |
| H | -2.847525 | 3.493956  | 0.039966  |
| C | -1.327389 | -0.898111 | -0.053605 |
| C | -2.386982 | -1.831643 | -0.258528 |
| C | -1.790872 | -3.090627 | -0.334873 |
| C | -0.398082 | -2.945984 | -0.185562 |
| N | -0.144459 | -1.600601 | -0.033816 |
| C | 1.943184  | -3.811701 | 0.026143  |
| C | 2.829406  | -4.961092 | 0.131070  |
| C | 4.072319  | -4.460405 | 0.311776  |
| H | 5.002111  | -4.997694 | 0.433153  |
| C | 0.572431  | -3.951036 | -0.144235 |
| C | 3.937523  | -3.005737 | 0.293113  |
| N | 2.644341  | -2.633598 | 0.130457  |
| C | 5.169785  | 1.400978  | -0.002698 |
| C | 5.330857  | -0.845263 | 0.293653  |
| C | 6.651198  | -0.284948 | 0.340531  |
| H | 7.356038  | 1.783783  | 0.123378  |
| H | 7.545031  | -0.870985 | 0.490932  |
| C | 3.478245  | 3.322395  | -0.288990 |
| C | 3.408502  | 4.774372  | -0.436887 |
| C | 2.095417  | 5.096503  | -0.434150 |
| C | 1.373780  | 3.841633  | -0.290019 |
| N | 2.240061  | 2.775651  | -0.215862 |
| H | 4.261533  | 5.432802  | -0.519143 |
| H | 1.640432  | 6.073336  | -0.514816 |
| C | 5.087877  | -2.205853 | 0.393457  |
| C | 6.555533  | 1.060315  | 0.151789  |
| C | 4.736134  | 2.702929  | -0.194742 |
| N | 4.465024  | 0.214719  | 0.094700  |
| C | -0.010717 | 3.791524  | -0.210427 |
| H | -0.535571 | 4.739012  | -0.253372 |
| H | 5.563557  | 3.402245  | -0.254556 |
| H | 5.999618  | -2.775729 | 0.538634  |
| H | 0.800133  | -1.272453 | 0.137468  |
| H | 3.464188  | 0.129141  | 0.005524  |
| H | 2.520186  | -5.995132 | 0.077693  |

|   |           |           |           |
|---|-----------|-----------|-----------|
| H | 0.195772  | -4.963198 | -0.238217 |
| H | -2.288039 | -4.037325 | -0.473163 |
| C | -3.798706 | -1.553288 | -0.392207 |
| C | -4.535384 | -0.383418 | -0.046963 |
| C | -4.724314 | -2.551751 | -0.784782 |
| C | -5.982012 | -0.749624 | -0.210155 |
| C | -4.050759 | 0.887265  | 0.320706  |
| C | -6.019575 | -2.069128 | -0.698239 |
| H | -4.452314 | -3.548926 | -1.101602 |
| C | -7.139953 | -0.020959 | 0.048818  |
| C | -4.856699 | 1.917882  | 0.881733  |
| H | -6.924389 | -2.609361 | -0.938794 |
| C | -7.273364 | 1.238003  | 0.614505  |
| H | -8.064321 | -0.539904 | -0.193991 |
| C | -6.228069 | 2.071161  | 1.014763  |
| H | -4.293777 | 2.749431  | 1.283138  |
| H | -8.281725 | 1.601804  | 0.779774  |
| H | -6.530204 | 2.999715  | 1.492179  |

| <b>Hx-1,2-HP</b> |           |           |           |
|------------------|-----------|-----------|-----------|
| C                | 8.407539  | -0.852567 | 0.183329  |
| H                | 9.411862  | -0.460205 | 0.234834  |
| C                | 8.023452  | -2.162569 | 0.126788  |
| H                | 8.094877  | 1.876962  | 0.245082  |
| C                | 7.150792  | 1.347434  | 0.191816  |
| C                | 5.907875  | 3.570292  | 0.178979  |
| C                | 7.220381  | -0.041087 | 0.160111  |
| C                | 4.595653  | 3.892623  | 0.118790  |
| C                | 5.971791  | 2.107320  | 0.154906  |
| H                | 6.754088  | 4.240675  | 0.237078  |
| C                | 6.587091  | -2.203275 | 0.069140  |
| C                | 5.789253  | -3.337426 | -0.000362 |
| C                | 3.860163  | 2.623031  | 0.059289  |
| H                | 6.315364  | -4.285312 | -0.018183 |
| H                | 4.176121  | 4.884584  | 0.125541  |
| C                | 1.388848  | 4.724402  | -0.137946 |
| N                | 4.737857  | 1.574381  | 0.087280  |
| C                | 2.494432  | 2.368782  | -0.004258 |
| C                | 1.404017  | 3.257975  | -0.067718 |
| C                | 0.087095  | 5.089269  | -0.184328 |
| N                | 6.152615  | -0.900623 | 0.093027  |
| C                | 4.386736  | -3.381269 | -0.051296 |
| C                | -0.684851 | 3.849629  | -0.142093 |
| H                | 2.242932  | 5.380127  | -0.160186 |
| N                | 3.584365  | -2.297280 | -0.025470 |
| N                | 0.143815  | 2.769496  | -0.076979 |
| C                | 3.602305  | -4.611339 | -0.134426 |

|   |            |           |           |
|---|------------|-----------|-----------|
| C | 2.302886   | -2.765836 | -0.101530 |
| C | 1.225840   | -1.875616 | -0.067909 |
| C | -2.068452  | 3.776171  | -0.157089 |
| C | 2.303906   | -4.229748 | -0.168071 |
| H | -0.322009  | 6.088110  | -0.244257 |
| C | -0.145660  | -2.136618 | -0.204068 |
| H | 2.225688   | 1.318657  | -0.003065 |
| N | -1.058599  | -1.147149 | 0.009707  |
| N | -2.419179  | 1.316474  | -0.051867 |
| C | -2.865669  | 2.619202  | -0.111400 |
| C | -0.826865  | -3.372462 | -0.572912 |
| H | 1.486121   | -0.836937 | 0.103039  |
| C | -2.281342  | -1.704506 | -0.147185 |
| H | 4.000177   | -5.616449 | -0.151040 |
| H | -1.441597  | 1.023406  | -0.021299 |
| C | -2.155749  | -3.104327 | -0.537446 |
| C | -3.480788  | -0.957339 | 0.008192  |
| C | -3.479072  | 0.461575  | 0.000134  |
| H | -2.615155  | 4.711652  | -0.204072 |
| H | 5.176003   | -0.603691 | 0.062833  |
| H | 1.442820   | -4.875885 | -0.196116 |
| C | -4.278472  | 2.582565  | -0.109351 |
| H | -0.369099  | -4.297726 | -0.879998 |
| C | -4.673827  | 1.249989  | -0.034660 |
| H | -2.953443  | -3.769798 | -0.824080 |
| H | -4.902353  | 3.461482  | -0.158201 |
| H | 8.656792   | -3.036801 | 0.124215  |
| C | -5.989141  | 0.631577  | -0.002624 |
| C | -7.135787  | 1.449818  | -0.057704 |
| C | -5.982451  | -0.769894 | 0.100566  |
| C | -8.480180  | 1.098864  | -0.013256 |
| H | -6.945812  | 2.513428  | -0.148838 |
| C | -7.119051  | -1.693660 | 0.272438  |
| C | -4.796566  | -1.539862 | 0.139975  |
| C | -9.086495  | -0.152386 | 0.130906  |
| H | -9.170158  | 1.934522  | -0.091606 |
| C | -8.475199  | -1.398303 | 0.274060  |
| C | -6.565173  | -2.988910 | 0.450414  |
| C | -5.187056  | -2.896695 | 0.387231  |
| H | -10.171625 | -0.150161 | 0.147057  |
| H | -9.142233  | -2.247185 | 0.401916  |
| H | -7.138485  | -3.888013 | 0.626091  |
| H | -4.510247  | -3.721470 | 0.546768  |

| <b>Hx-1,2-PH</b> |          |           |          |
|------------------|----------|-----------|----------|
| C                | 8.253128 | -1.201893 | 0.259037 |
| H                | 9.276139 | -0.872573 | 0.358963 |

|   |           |           |           |
|---|-----------|-----------|-----------|
| C | 7.797265  | -2.488215 | 0.094921  |
| H | 8.091773  | 1.529193  | 0.497973  |
| C | 7.119617  | 1.062537  | 0.385628  |
| C | 6.017036  | 3.347448  | 0.442577  |
| C | 7.118244  | -0.334409 | 0.269089  |
| C | 4.727145  | 3.745272  | 0.339438  |
| C | 6.002193  | 1.889327  | 0.351880  |
| H | 6.894509  | 3.965503  | 0.571312  |
| C | 6.372404  | -2.440269 | 0.007135  |
| C | 5.503822  | -3.524540 | -0.169084 |
| C | 3.928752  | 2.522212  | 0.189786  |
| H | 5.980522  | -4.493862 | -0.266717 |
| H | 4.359150  | 4.756766  | 0.382535  |
| C | 1.605160  | 4.759768  | -0.174059 |
| N | 4.728928  | 1.432249  | 0.210194  |
| C | 2.537940  | 2.352299  | 0.059002  |
| C | 1.524904  | 3.298240  | -0.061709 |
| C | 0.332706  | 5.201610  | -0.288663 |
| N | 6.007270  | -1.123330 | 0.119610  |
| C | 4.115488  | -3.489002 | -0.233382 |
| C | -0.519960 | 4.010953  | -0.240948 |
| H | 2.500458  | 5.358516  | -0.187483 |
| N | 3.367226  | -2.356704 | -0.096903 |
| N | 0.219671  | 2.893470  | -0.113266 |
| C | 3.257564  | -4.649516 | -0.443378 |
| C | 2.078220  | -2.737120 | -0.221454 |
| C | 1.042181  | -1.783655 | -0.077208 |
| C | -1.920795 | 4.037937  | -0.304126 |
| C | 1.985444  | -4.183497 | -0.441141 |
| H | -0.009921 | 6.220964  | -0.399513 |
| C | -0.320201 | -1.937512 | -0.268581 |
| H | 2.208640  | 1.319600  | 0.048263  |
| N | -1.191759 | -0.921902 | 0.079107  |
| N | -2.407201 | 1.625291  | -0.104871 |
| C | -2.784159 | 2.949965  | -0.235453 |
| C | -1.071220 | -3.061532 | -0.816518 |
| H | 1.363722  | -0.801120 | 0.249996  |
| C | -2.423708 | -1.374140 | -0.158723 |
| H | 3.591433  | -5.670781 | -0.561890 |
| H | -1.445446 | 1.295714  | -0.025657 |
| C | -2.379357 | -2.715728 | -0.753437 |
| C | -3.599266 | -0.562404 | 0.042325  |
| C | -3.514456 | 0.833524  | -0.028814 |
| H | -2.393987 | 5.008296  | -0.403147 |
| H | 5.048715  | -0.771500 | 0.090437  |
| H | 1.083664  | -4.765227 | -0.535027 |
| C | -4.209372 | 2.990894  | -0.267054 |
| H | -0.664625 | -3.958906 | -1.252367 |
| C | -4.675005 | 1.698339  | -0.132238 |
| H | -3.219203 | -3.275052 | -1.135418 |

|   |           |           |           |
|---|-----------|-----------|-----------|
| H | -4.789280 | 3.893969  | -0.379254 |
| H | 8.383203  | -3.393032 | 0.039215  |
| C | -4.937546 | -1.138207 | 0.251226  |
| C | -5.031247 | -2.478565 | 0.687886  |
| C | -6.066477 | -0.291325 | 0.107771  |
| C | -6.147141 | -3.293059 | 0.875985  |
| H | -4.091029 | -2.953344 | 0.933225  |
| C | -7.507811 | -0.605695 | 0.151568  |
| C | -5.961277 | 1.089114  | -0.107634 |
| C | -7.507979 | -3.037430 | 0.711066  |
| H | -5.910962 | -4.300848 | 1.207144  |
| C | -8.120677 | -1.825093 | 0.384798  |
| C | -8.202530 | 0.620909  | -0.078674 |
| C | -7.279037 | 1.636980  | -0.215855 |
| H | -8.172642 | -3.875529 | 0.894899  |
| H | -9.206964 | -1.828726 | 0.343055  |
| H | -9.278232 | 0.718609  | -0.114168 |
| H | -7.508538 | 2.682716  | -0.371376 |

| <b>Hx-2,3-HP</b> |           |           |           |
|------------------|-----------|-----------|-----------|
| C                | 7.822139  | -2.037320 | 0.399617  |
| H                | 8.876196  | -1.872809 | 0.564345  |
| C                | 7.191236  | -3.225096 | 0.133224  |
| H                | 8.057251  | 0.668717  | 0.791078  |
| C                | 7.032312  | 0.359022  | 0.620342  |
| C                | 6.277091  | 2.786506  | 0.725787  |
| C                | 6.828543  | -1.005881 | 0.419056  |
| C                | 5.066218  | 3.377837  | 0.578950  |
| C                | 6.047575  | 1.350725  | 0.590723  |
| H                | 7.230396  | 3.262178  | 0.908996  |
| C                | 5.791410  | -2.956667 | -0.013824 |
| C                | 4.783432  | -3.884173 | -0.295905 |
| C                | 4.103329  | 2.294461  | 0.368009  |
| H                | 5.108908  | -4.910633 | -0.422059 |
| H                | 4.848551  | 4.431495  | 0.640230  |
| C                | 2.188330  | 4.836669  | -0.255028 |
| N                | 4.733127  | 1.091660  | 0.394763  |
| C                | 2.715529  | 2.334827  | 0.172647  |
| C                | 1.869438  | 3.422257  | -0.049611 |
| C                | 1.011429  | 5.456169  | -0.511303 |
| N                | 5.620352  | -1.610830 | 0.169932  |
| C                | 3.420100  | -3.623618 | -0.419658 |
| C                | -0.015711 | 4.418150  | -0.451141 |
| H                | 3.167659  | 5.285816  | -0.241254 |
| N                | 2.852657  | -2.399830 | -0.270716 |
| N                | 0.526209  | 3.215637  | -0.174923 |
| C                | 2.402589  | -4.635149 | -0.706777 |

|   |           |           |           |
|---|-----------|-----------|-----------|
| C | 1.515756  | -2.576287 | -0.422285 |
| C | 0.642316  | -1.483863 | -0.293933 |
| C | -1.384842 | 4.635854  | -0.661976 |
| C | 1.216600  | -3.986378 | -0.709212 |
| H | 0.844341  | 6.501912  | -0.728790 |
| C | -0.753468 | -1.457547 | -0.274683 |
| H | 2.229394  | 1.365986  | 0.169603  |
| N | -1.396351 | -0.239840 | -0.134755 |
| N | -2.317102 | 2.376157  | -0.242647 |
| C | -2.415216 | 3.708490  | -0.581436 |
| C | -1.714826 | -2.541326 | -0.319858 |
| H | 1.123266  | -0.522109 | -0.160795 |
| C | -2.699726 | -0.518274 | -0.066897 |
| H | 2.587166  | -5.685214 | -0.885411 |
| H | -1.443365 | 1.864694  | -0.093515 |
| C | -2.947488 | -1.965697 | -0.178851 |
| C | -3.772757 | 0.409722  | 0.039846  |
| C | -3.555971 | 1.790258  | -0.217605 |
| H | -1.689843 | 5.646966  | -0.909173 |
| H | 4.725908  | -1.119349 | 0.123790  |
| H | 0.248164  | -4.413073 | -0.907788 |
| C | -3.801725 | 3.969452  | -0.816965 |
| H | -1.502178 | -3.592357 | -0.409106 |
| C | -4.495886 | 2.809864  | -0.603809 |
| H | -4.198627 | 4.922105  | -1.133645 |
| H | 7.637751  | -4.203634 | 0.042907  |
| H | -5.549585 | 2.656287  | -0.758957 |
| C | -5.112288 | -0.131274 | 0.339678  |
| C | -6.086289 | 0.726285  | 0.892519  |
| C | -5.323229 | -1.525503 | 0.166812  |
| C | -7.437307 | 0.509078  | 1.169773  |
| H | -5.734511 | 1.709882  | 1.170863  |
| C | -6.568526 | -2.315339 | 0.254358  |
| C | -4.291342 | -2.429202 | -0.124033 |
| C | -8.237987 | -0.617214 | 0.997313  |
| H | -7.949447 | 1.372134  | 1.587005  |
| C | -7.845099 | -1.892449 | 0.581268  |
| C | -6.217251 | -3.667786 | -0.038952 |
| C | -4.854010 | -3.739140 | -0.242314 |
| H | -9.285292 | -0.499030 | 1.256664  |
| H | -8.621632 | -2.652603 | 0.552934  |
| H | -6.917563 | -4.490595 | -0.064266 |
| H | -4.291758 | -4.640116 | -0.448442 |

| <b>Hx-2,3-PH</b> |           |           |          |
|------------------|-----------|-----------|----------|
| C                | -7.617269 | -2.481565 | 0.265710 |
| H                | -8.684683 | -2.396572 | 0.402222 |

|   |           |           |           |
|---|-----------|-----------|-----------|
| C | -6.892092 | -3.615940 | 0.029288  |
| H | -8.065810 | 0.206556  | 0.640021  |
| C | -7.018137 | -0.028091 | 0.492241  |
| C | -6.441982 | 2.448149  | 0.631223  |
| C | -6.704349 | -1.371623 | 0.300824  |
| C | -5.278851 | 3.129940  | 0.520817  |
| C | -6.101485 | 1.031221  | 0.484328  |
| H | -7.432666 | 2.847581  | 0.798004  |
| C | -5.508167 | -3.243793 | -0.084579 |
| C | -4.434034 | -4.089841 | -0.322579 |
| C | -4.228411 | 2.124152  | 0.315573  |
| H | -4.675714 | -5.140277 | -0.440428 |
| H | -5.145755 | 4.196243  | 0.598220  |
| C | -2.504790 | 4.837009  | -0.121259 |
| N | -4.773510 | 0.873176  | 0.312246  |
| C | -2.852843 | 2.273891  | 0.151663  |
| C | -2.078902 | 3.437062  | 0.005261  |
| C | -1.376714 | 5.561080  | -0.301058 |
| N | -5.449397 | -1.881693 | 0.089041  |
| C | -3.078968 | -3.727918 | -0.413531 |
| C | -0.270715 | 4.604367  | -0.277942 |
| H | -3.515819 | 5.208569  | -0.105201 |
| N | -2.614918 | -2.469881 | -0.276560 |
| N | -0.731696 | 3.339844  | -0.094172 |
| C | -1.984807 | -4.665327 | -0.651490 |
| C | -1.253947 | -2.545850 | -0.390275 |
| C | -0.482214 | -1.388122 | -0.272204 |
| C | 1.069107  | 4.939329  | -0.430625 |
| C | -0.846995 | -3.929816 | -0.636508 |
| H | -1.287064 | 6.628881  | -0.444090 |
| C | 0.913821  | -1.235078 | -0.226392 |
| H | -2.294157 | 1.346058  | 0.111996  |
| N | 1.463510  | 0.022125  | -0.161277 |
| N | 2.173404  | 2.729316  | -0.181509 |
| C | 2.177808  | 4.082655  | -0.396550 |
| C | 1.948536  | -2.239640 | -0.178450 |
| H | -1.045749 | -0.466133 | -0.184518 |
| C | 2.788752  | -0.150276 | -0.068536 |
| H | -2.085798 | -5.729166 | -0.815766 |
| H | 1.337995  | 2.148579  | -0.078747 |
| C | 3.142008  | -1.565899 | -0.072345 |
| C | 3.784131  | 0.865305  | -0.001034 |
| C | 3.459124  | 2.236950  | -0.181349 |
| H | 1.301792  | 5.986616  | -0.589714 |
| H | -4.597428 | -1.319116 | 0.060645  |
| H | 0.153431  | -4.290663 | -0.808207 |
| C | 3.538307  | 4.470434  | -0.569803 |
| H | 1.800257  | -3.305858 | -0.185659 |
| C | 4.318838  | 3.347441  | -0.442533 |
| H | 3.866598  | 5.476502  | -0.782184 |

|   |           |           |           |
|---|-----------|-----------|-----------|
| H | -7.259392 | -4.627042 | -0.061381 |
| H | 5.384395  | 3.296268  | -0.576603 |
| C | 4.515431  | -2.017752 | 0.039754  |
| C | 4.796748  | -3.398404 | -0.003042 |
| C | 5.464550  | -0.989577 | 0.204763  |
| C | 6.010023  | -4.065391 | 0.116456  |
| H | 3.936346  | -4.040971 | -0.153367 |
| C | 6.906502  | -1.100585 | 0.473008  |
| C | 5.129467  | 0.387647  | 0.224931  |
| C | 7.297030  | -3.569819 | 0.346741  |
| H | 5.945035  | -5.146431 | 0.028915  |
| C | 7.692835  | -2.245216 | 0.521923  |
| C | 7.384100  | 0.219603  | 0.689890  |
| C | 6.327832  | 1.100683  | 0.556444  |
| H | 8.083773  | -4.314709 | 0.411060  |
| H | 8.749153  | -2.082422 | 0.720557  |
| H | 8.404205  | 0.476192  | 0.937770  |
| H | 6.399613  | 2.162747  | 0.729559  |

| <b>Hx-4,4-HP</b> |           |           |           |
|------------------|-----------|-----------|-----------|
| N                | 3.873006  | -1.860847 | -0.335072 |
| N                | 3.174310  | 2.815528  | 0.142018  |
| N                | -0.928853 | 2.143195  | 0.027546  |
| N                | -0.190145 | -2.463698 | 0.180344  |
| N                | 0.870311  | 4.521341  | 0.274912  |
| N                | 2.215798  | -4.183900 | -0.068741 |
| C                | 3.424152  | -4.795162 | -0.293569 |
| C                | 4.636001  | -4.154475 | -0.541051 |
| C                | 4.847015  | -2.771824 | -0.551589 |
| C                | 4.475497  | -0.640304 | -0.352745 |
| C                | 3.710400  | 0.508944  | -0.137090 |
| C                | 4.112780  | 1.842021  | 0.006395  |
| C                | 3.848614  | 3.980210  | 0.287872  |
| C                | 3.230538  | 5.224229  | 0.428255  |
| C                | 1.856728  | 5.465980  | 0.413049  |
| C                | -0.363899 | 5.122992  | 0.254361  |
| C                | -1.852387 | 3.126524  | -0.041349 |
| C                | -1.595936 | 4.495804  | 0.093708  |
| C                | -1.601122 | 0.964143  | -0.081592 |
| C                | -0.842448 | -0.206154 | 0.013826  |
| C                | -1.189433 | -1.537489 | 0.223398  |
| C                | 1.248331  | -5.122273 | 0.192005  |
| C                | -0.091912 | -4.883496 | 0.473392  |
| C                | -0.760022 | -3.650584 | 0.484592  |
| C                | 6.139042  | -2.115256 | -0.749074 |
| C                | 5.910665  | -0.787473 | -0.621328 |
| C                | 5.459474  | 2.420230  | 0.081010  |
| C                | 5.292245  | 3.751204  | 0.260447  |
| C                | 1.206928  | 6.740270  | 0.501833  |



|   |           |           |           |
|---|-----------|-----------|-----------|
| C | -0.142452 | 6.532386  | 0.401058  |
| C | -3.041614 | 1.208753  | -0.332396 |
| C | -3.164725 | 2.571303  | -0.279473 |
| C | -2.164522 | -3.490104 | 0.777943  |
| C | -2.476564 | -2.164736 | 0.618880  |
| C | 3.204296  | -6.209224 | -0.183732 |
| C | 1.886018  | -6.407505 | 0.121024  |
| H | 7.076579  | -2.611353 | -0.957763 |
| H | 6.633023  | 0.005025  | -0.724703 |
| H | 2.642178  | 0.340791  | -0.054158 |
| H | 6.394524  | 1.887476  | 0.033556  |
| H | 6.055992  | 4.508295  | 0.370369  |
| H | 1.047243  | 3.520256  | 0.187404  |
| H | 0.227338  | -0.033714 | -0.030886 |
| H | -2.842930 | -4.291258 | 1.030911  |
| H | -0.685700 | -5.763853 | 0.693242  |
| H | 2.073187  | -3.173591 | -0.080469 |
| H | 1.379045  | -7.346875 | 0.281561  |
| H | 3.972181  | -6.956628 | -0.313803 |
| H | 5.492129  | -4.798266 | -0.707014 |
| H | 1.723547  | 7.680775  | 0.618709  |
| H | 3.866395  | 6.094950  | 0.540657  |
| H | -0.928071 | 7.272353  | 0.422455  |
| H | -4.076597 | 3.139948  | -0.390799 |
| H | -2.454131 | 5.158122  | 0.065854  |
| C | -4.238575 | 0.392653  | -0.653156 |
| C | -5.035069 | 0.976637  | -1.665231 |
| C | -4.615047 | -0.750569 | 0.094702  |
| C | -6.374052 | 0.810051  | -2.018075 |
| H | -4.508882 | 1.707041  | -2.267799 |
| C | -6.045763 | -1.079426 | 0.403979  |
| C | -3.829528 | -1.668155 | 0.832692  |
| C | -7.375955 | 0.109854  | -1.360195 |
| H | -6.685921 | 1.372101  | -2.894250 |
| C | -7.216642 | -0.679776 | -0.221247 |
| C | -6.029843 | -2.042155 | 1.442129  |
| C | -4.722300 | -2.416185 | 1.663443  |
| H | -8.381403 | 0.198073  | -1.758281 |
| H | -8.124806 | -1.107131 | 0.197177  |
| H | -6.911109 | -2.452101 | 1.914846  |
| H | -4.398291 | -3.182969 | 2.353492  |

## 5. Magnitudes of different transition dipole moment vector:-

| System     | $f$ | $\mu^{00}$ | $\mu^{ff}$ | $\mu^{ii}$ | $\mu^{if}$ | $\mu^{fi}$ | $\mu^{oi}$ | $\mu^{io}$ | $\mu^{of}$ | $\mu^{fo}$ |
|------------|-----|------------|------------|------------|------------|------------|------------|------------|------------|------------|
| Pr-1,2-HP  | 5   | 0.63       | 0.59       | 0.52       | 3.24       | 1.21       | 2.19       | 1.54       | 2.44       | 2.19       |
| Pr-1,2-PH  | 5   | 0.43       | 1.04       | 0.20       | 1.91       | 1.23       | 1.77       | 1.34       | 2.95       | 2.76       |
| NCP-1,2-HP | 5   | 0.73       | 1.41       | 1.36       | 3.15       | 1.65       | 2.47       | 1.75       | 2.66       | 3.04       |
| NCP-1,2-PH | 5   | 0.60       | 0.82       | 0.47       | 0.36       | 0.36       | 2.19       | 1.73       | 3.04       | 1.93       |
| SP-1,2-HP  | 4   | 1.27       | 1.17       | 1.25       | 1.25       | 0.50       | 1.35       | 0.97       | 1.88       | 1.19       |
|            | 5   | 1.27       | 1.37       | 1.25       | 2.10       | 0.11       | 1.35       | 0.97       | 2.49       | 1.55       |
| SP-1,2-PH  | 4   | 1.24       | 1.17       | 1.12       | 1.86       | 1.34       | 1.18       | 0.85       | 0.66       | 0.43       |
|            | 5   | 1.24       | 1.27       | 1.12       | 0.32       | 0.46       | 1.18       | 0.85       | 3.45       | 2.21       |
| S-5,6-HP   | 5   | 0.31       | 0.92       | 0.36       | 2.06       | 0.90       | 3.03       | 2.49       | 2.98       | 2.63       |
| S-5,6-PH   | 5   | 0.94       | 1.62       | 1.04       | 3.32       | 1.93       | 3.08       | 2.09       | 2.65       | 3.45       |
| Hx-2,3-HP  | 4   | 0.77       | 3.74       | 1.27       | 0.59       | 0.29       | 2.15       | 1.55       | 3.08       | 2.21       |
|            | 5   | 0.77       | 1.06       | 1.27       | 2.67       | 1.47       | 2.15       | 1.55       | 2.89       | 2.35       |
| Hx-2,3-PH  | 4   | 1.04       | 1.15       | 0.64       | 2.54       | 1.86       | 2.75       | 2.01       | 4.56       | 2.55       |
|            | 5   | 1.04       | 0.58       | 0.64       | 0.14       | 11.98      | 2.75       | 2.01       | 5.38       | 2.77       |

**Table S2:** Different transition dipole moment vectors involved for porphyrinoid-azulene systems.

## 6. Two-photon absorption cross section:-

| System     | 1st  | 2nd  | 3rd   | 4th   | 5th    |
|------------|------|------|-------|-------|--------|
| Pr         | 0    | 0    | 0     | 0     | 0      |
| Pr-1,2-HP  | 1433 | 3981 | 2815  | 74352 | 399499 |
| Pr-1,2-PH  | 538  | 5052 | 18427 | 61804 | 47444  |
| NCP        | 19   | 14   | 12    | 52    | 1297   |
| NCP-1,2-HP | 2808 | 2683 | 1421  | 99513 | 539020 |
| NCP-1,2-PH | 1401 | 5668 | 27593 | 80415 | 5192   |
| SP         | 610  | 614  | 25    | 17    | 1      |
| SP-1,2-HP  | 89   | 4663 | 4401  | 33075 | 16347  |
| SP-1,2-PH  | 106  | 6669 | 712   | 35877 | 1252   |

|           |        |        |        |           |          |
|-----------|--------|--------|--------|-----------|----------|
| S         | 2,100  | 862    | 67     | 112       | NA       |
| S-1,2-HP  | 1,535  | 10,124 | 17,882 | 1,33,074  | 95,238   |
| S-2,3-PH  | 1,453  | 11,362 | 8,936  | 8,080     | 2,18,966 |
| S-4,5-HP  | 8,265  | 34,091 | 319    | 23,285    | 1,33,563 |
| S-4,5-PH  | 3,282  | 42,735 | 5,778  | 1,29,499  | 4,710    |
| S-5,6-HP  | 1297   | 24184  | 14124  | 178277    | 60752    |
| S-5,6-PH  | 17368  | 10559  | 3501   | 179961    | 1687515  |
| S-7,7-HP  | 962    | 5,201  | 5,879  | 90,533    | 82,284   |
| S-7,7-PH  | 955    | 5,184  | 5,876  | 90,518    | 82,301   |
| Hx        | 0      | 0      | 0      | 0         | 0        |
| Hx-1,2-HP | 64,002 | 10,479 | 70,746 | 5,38,030  | 50558    |
| Hx-1,2-PH | 64002  | 10479  | 70746  | 538030    | 50558    |
| Hx-2,3-HP | 20,038 | 14,084 | 4,380  | 21,88,878 | 3,34,337 |
| Hx-2,3-PH | 2496   | 28346  | 11972  | 58818     | 473426   |
| Hx-4,4-HP | 1,792  | 12,209 | 2,413  | 31,862    | 7,956    |

**Table S3:** TPA transition strength of the first five singlet excited states of all the systems computed at RICC2/cc-pVDZ level of theory.
